# Supplementary material for: Spatial impact effects of coupled coordination between forestry factor endowment and technological progress bias on forestry industry structural upgrading in China
Source: Frontiers journal article supplement (doi:10.3389/fenvs.2024.1422480), 2024-11-28
Supplement: Supplementary_file_1.docx [file Supplementary_file_1.docx]

Supplementary Material

Spatial Impact Effects of Coupled Coordination Between Forestry Factor Endowment and Technological Progress Bias on Forestry Industry Structural Upgrading in China

Yu Jiang *, Yuanwei Liao, Canyu Shen

*** Correspondence:** Corresponding Author: jiangy_lj@nefu.edu.cn

# Supplementary Tables

**Table A1.** Descriptive statistics table.

| Variable Name | Symbols | Average | Standard  Deviation | Minimum | Maximum |
| --- | --- | --- | --- | --- | --- |
| The rationalization of the forestry industry structure | *RFIS* | 1.004 | 0.844 | 0.000 | 4.041 |
| The advancement of the forestry industry structure | *AFIS* | 1.608 | 0.295 | 1.005 | 2.355 |
| The ecologicalization of the forestry industry structure | *EFIS* | 0.515 | 0.164 | 0.123 | 0.924 |
| The coupling coordination between forestry factor endowment and technological progress bias | *D* | 0.412 | 0.089 | 0.250 | 0.801 |
| Forestry labor productivity | *LR* | 500.257 | 740.778 | 1.910 | 5144.908 |
| Forestry land productivity | *AR* | 22983.980 | 47435.890 | 31.420 | 345625.800 |
| Forestry capital productivity | *KR* | 11.974 | 24.611 | 0.040 | 149.099 |
| The control rate of forestry pests and diseases | *PCR* | 0.738 | 0.221 | 0.085 | 1.000 |
| The average income of forestry personnel | *AI* | 35466.620 | 31508.160 | 5434.000 | 519899.200 |
| National forestry investment | *NI* | 127934.700 | 165294.600 | 66.000 | 1097705.000 |
| The degree of openness | *OPEN* | 0.292 | 0.355 | 0.008 | 1.799 |
| Economic development level | *GDP* | 31591.940 | 17951.870 | 5051.960 | 107584.400 |
| Urbanization rate | *UR* | 0.548 | 0.147 | 0.209 | 0.896 |

**Table A2.** Results of spatial correlation testing for the upgrading of the forestry industry structure.

| Year | *RFIS* | | *AFIS* | | *EFIS* | |
| --- | --- | --- | --- | --- | --- | --- |
| Moran’s I | p | Moran’s I | p | Moran’s I | p |
| 2005 | 0.080*** | 0.007 | 0.143*** | 0.000 | 0.168*** | 0.000 |
| 2006 | 0.058** | 0.042 | 0.152*** | 0.000 | 0.188*** | 0.000 |
| 2007 | 0.072** | 0.020 | 0.189*** | 0.000 | 0.140*** | 0.000 |
| 2008 | 0.087*** | 0.008 | 0.045* | 0.090 | 0.204*** | 0.000 |
| 2009 | 0.110*** | 0.001 | 0.093*** | 0.006 | 0.175*** | 0.000 |
| 2010 | 0.060** | 0.037 | 0.081** | 0.013 | 0.129*** | 0.000 |
| 2011 | 0.093*** | 0.005 | 0.080** | 0.014 | 0.114*** | 0.001 |
| 2012 | 0.088*** | 0.007 | 0.175*** | 0.000 | 0.093*** | 0.004 |
| 2013 | 0.083*** | 0.009 | 0.212*** | 0.000 | 0.097*** | 0.003 |
| 2014 | 0.004 | 0.407 | 0.182*** | 0.000 | 0.093*** | 0.005 |
| 2015 | 0.037 | 0.117 | 0.130*** | 0.000 | 0.083** | 0.011 |
| 2016 | 0.065** | 0.030 | 0.109*** | 0.002 | 0.087*** | 0.008 |
| 2017 | 0.025 | 0.189 | 0.148*** | 0.000 | 0.070** | 0.023 |
| 2018 | 0.048* | 0.068 | 0.149*** | 0.000 | 0.110*** | 0.002 |
| 2019 | 0.054** | 0.049 | 0.129*** | 0.000 | 0.098*** | 0.003 |
| 2020 | 0.055** | 0.042 | 0.090*** | 0.007 | 0.154**** | 0.000 |
| 2021 | 0.057** | 0.036 | 0.081** | 0.012 | 0.157*** | 0.000 |

Note: *** Significant at the 0.01 level, ** Significant at the 0.01 level, * Significant at the 0.01 level.

**Table A3.** Robustness test results of rationalization of the forestry industry structure.

| Variables | Change the Sample Size | | | | Change the Core Explanatory Variable | | | |
| --- | --- | --- | --- | --- | --- | --- | --- | --- |
| X | | W*X | | X | | W*X | |
| Results | *p* | Results | *p* | Results | *p* | Results | *p* |
| *D* | -0.891** | 0.033 | 2.882 | 0.168 | -1.631*** | 0.000 | 0.030 | 0.986 |
| *LR* | 0.009 | 0.742 | 0.083 | 0.576 | 0.012 | 0.638 | 0.054 | 0.707 |
| *AR* | -0.007 | 0.725 | 0.064 | 0.570 | -0.008 | 0.662 | 0.076 | 0.472 |
| *KR* | 0.001 | 0.178 | 0.003 | 0.383 | 0.001 | 0.205 | 0.004 | 0.260 |
| *PCR* | -0.153 | 0.226 | -1.985*** | 0.003 | -0.167 | 0.166 | -1.851*** | 0.004 |
| *AI* | 0.219* | 0.094 | -0.784 | 0.234 | 0.167* | 0.089 | -0.604 | 0.285 |
| *NI* | -0.004 | 0.782 | 0.170* | 0.063 | -0.012 | 0.417 | 0.101 | 0.228 |
| *OPEN* | -0.926*** | 0.000 | -4.253*** | 0.000 | -0.929*** | 0.000 | -4.486*** | 0.000 |
| *GDP* | -0.662*** | 0.000 | -2.724*** | 0.003 | -0.638*** | 0.000 | -2.919*** | 0.001 |
| *UR* | 5.118*** | 0.000 | 39.681*** | 0.000 | 3.212*** | 0.001 | 34.846*** | 0.000 |
| *Rho* | -0.415*** | 0.005 |  |  | -0.446*** | 0.002 |  |  |
| *LogL* | -102.490 |  |  |  | -134.897 |  |  |  |
| *R-squared* | 0.014 |  |  |  | 0.026 |  |  |  |
| *sigma^2* | 0.090*** | 0.000 |  |  | 0.097*** | 0.000 |  |  |

Note: *** Significant at the 0.01 level, ** Significant at the 0.01 level, * Significant at the 0.01 level.

**Table A4.** Robustness test results of rationalization of the forestry industry structure in four regions.

|  | Variables | Eastern | | Central | | Western | | Northeastern | |
| --- | --- | --- | --- | --- | --- | --- | --- | --- | --- |
| Results | *p* | Results | *p* | Results | *p* | Results | *p* |
| Change the Sample Size | *D* | 2.231** | 0.016 | -0.340 | 0.739 | 0.635 | 0.222 | 0.025 | 0.968 |
| *LR* | 0.351*** | 0.004 | 0.025 | 0.675 | -0.168*** | 0.002 | 0.020 | 0.807 |
| *AR* | -0.227*** | 0.010 | -0.014 | 0.722 | 0.102** | 0.018 | 0.037 | 0.530 |
| *KR* | -0.011*** | 0.006 | 0.001 | 0.477 | 0.002* | 0.066 | 0.001 | 0.824 |
| *PCR* | -0.964** | 0.012 | -0.175 | 0.570 | -0.397** | 0.023 | -0.126 | 0.772 |
| *AI* | 0.292 | 0.202 | 1.764*** | 0.000 | -0.098 | 0.333 | -0.887*** | 0.001 |
| *NI* | -0.160*** | 0.004 | -0.025 | 0.580 | 0.005 | 0.848 | 0.154*** | 0.000 |
| *OPEN* | 2.062*** | 0.000 | 2.825 | 0.151 | 0.019 | 0.967 | -3.105*** | 0.000 |
| *GDP* | 2.465*** | 0.000 | -2.678*** | 0.000 | 0.169 | 0.389 | 0.861*** | 0.003 |
| *UR* | -10.447*** | 0.000 | 15.806** | 0.011 | 1.199* | 0.088 | 1.325 | 0.514 |
| *Cons* | -20.355*** | 0.000 |  |  | -0.641 | 0.636 | -1.437 | 0.547 |
| *Rho* |  |  |  |  |  |  |  |  |
| *Lambda* |  |  | -1.029*** | 0.000 |  |  |  |  |
| *LogL* |  |  | 4.769 |  |  |  |  |  |
| *R-squared* | 0.487 |  | 0.187 |  | 0.215 |  | 0.771 |  |
| *sigma^2* |  |  | 0.043*** | 0.000 |  |  |  |  |
| Change the Core Explanatory Variable | *D* | -5.755*** | 0.000 | -2.390* | 0.060 | -0.680** | 0.022 | 0.507 | 0.414 |
| *LR* | 0.109 | 0.323 | 0.021 | 0.714 | -0.152*** | 0.004 | 0.032 | 0.681 |
| *AR* | -0.045 | 0.573 | -0.010 | 0.793 | 0.084** | 0.047 | 0.028 | 0.636 |
| *KR* | 0.000 | 0.920 | 0.001 | 0.649 | 0.002* | 0.097 | 0.000 | 0.935 |
| *PCR* | -1.238*** | 0.000 | -0.175 | 0.563 | -0.523*** | 0.002 | -0.252 | 0.576 |
| *AI* | 0.309 | 0.110 | 1.494*** | 0.003 | -0.079 | 0.425 | -0.970*** | 0.001 |
| *NI* | 0.021 | 0.681 | -0.033 | 0.457 | 0.000 | 0.986 | 0.142*** | 0.001 |
| *OPEN* | 1.090*** | 0.000 | 2.921 | 0.123 | -0.378 | 0.449 | -2.888*** | 0.001 |
| *GDP* | 1.624*** | 0.000 | -2.711*** | 0.000 | 0.385** | 0.050 | 0.960*** | 0.003 |
| *UR* | -3.552** | 0.029 | 17.107*** | 0.005 | 0.183 | 0.779 | 1.519 | 0.444 |
| *Cons* | -15.262 | 0.000 |  |  | -1.736 | 0.193 | -1.690 | 0.472 |
| *Rho* |  |  |  |  |  |  |  |  |
| *Lambda* |  |  | -0.971*** | 0.000 |  |  |  |  |
| *LogL* |  |  | 6.447 |  |  |  |  |  |
| *R-squared* | 0.619 |  | 0.120 |  | 0.232 |  | 0.776 |  |
| *sigma^2* |  |  | 0.042*** | 0.000 |  |  |  |  |

Note: *** Significant at the 0.01 level, ** Significant at the 0.01 level, * Significant at the 0.01 level.

**Table A5.** Robustness test results of advancement of the forestry industry structure.

| Variables | Change the Sample Size | | | | Change the Core Explanatory Variable | | | |
| --- | --- | --- | --- | --- | --- | --- | --- | --- |
| X | | W*X | | X | | W*X | |
| Results | *p* | Results | *p* | Results | *p* | Results | *p* |
| *D* | -0.207* | 0.072 | -2.411*** | 0.000 | -0.708*** | 0.000 | -1.085** | 0.033 |
| *LR* | -0.015** | 0.042 | -0.043 | 0.294 | -0.016** | 0.032 | -0.053 | 0.212 |
| *AR* | 0.006 | 0.299 | 0.011 | 0.733 | 0.007 | 0.190 | 0.021 | 0.499 |
| *KR* | 0.000** | 0.034 | 0.001 | 0.343 | 0.000 | 0.248 | 0.000 | 0.672 |
| *PCR* | 0.057 | 0.102 | 0.043 | 0.820 | 0.023 | 0.510 | -0.040 | 0.832 |
| *AI* | -0.021 | 0.552 | -0.134 | 0.457 | -0.026 | 0.378 | 0.031 | 0.851 |
| *NI* | 0.005 | 0.225 | 0.016 | 0.534 | 0.004 | 0.300 | 0.016 | 0.517 |
| *OPEN* | -0.127*** | 0.010 | -1.259*** | 0.000 | -0.164*** | 0.001 | -0.887*** | 0.001 |
| *GDP* | 0.112** | 0.015 | 0.226 | 0.364 | 0.071 | 0.114 | 0.052 | 0.839 |
| *UR* | 1.272*** | 0.000 | 8.620*** | 0.000 | 0.693** | 0.018 | 6.974*** | 0.000 |
| *Rho* | -0.733*** | 0.005 |  |  | -0.820*** | 0.002 |  |  |
| *LogL* | 490.012 |  |  |  | 503.285 |  |  |  |
| *R-squared* | 0.465 |  |  |  | 0.516 |  |  |  |
| *sigma^2* | 0.007*** | 0.000 |  |  | 0.008*** | 0.000 |  |  |

Note: *** Significant at the 0.01 level, ** Significant at the 0.01 level, * Significant at the 0.01 level.

**Table A6.** Robustness test results of advancement of the forestry industry structure in four regions.

|  | Variables | Eastern | | Central | | Western | | Northeastern | |
| --- | --- | --- | --- | --- | --- | --- | --- | --- | --- |
| Results | *p* | Results | *p* | Results | *p* | Results | *p* |
| Change the Sample Size | *D* | -0.405** | 0.042 | 0.013 | 0.895 | -0.013 | 0.970 | 0.038 | 0.558 |
| *LR* | 0.017 | 0.333 | -0.004 | 0.575 | -0.115*** | 0.001 | -0.008** | 0.036 |
| *AR* | -0.019 | 0.137 | 0.000 | 0.934 | 0.056** | 0.042 | 0.009*** | 0.004 |
| *KR* | 0.000 | 0.885 | 0.000 | 0.316 | 0.001 | 0.308 | 0.000 | 0.621 |
| *PCR* | 0.180** | 0.032 | 0.033 | 0.267 | 0.000 | 0.999 | 0.053* | 0.056 |
| *AI* | -0.133* | 0.088 | 0.098* | 0.060 | 0.087 | 0.188 | -0.157*** | 0.000 |
| *NI* | -0.016* | 0.084 | 0.003 | 0.536 | 0.010 | 0.507 | 0.007*** | 0.005 |
| *OPEN* | -0.005 | 0.951 | -0.250 | 0.179 | 0.107 | 0.723 | -0.026 | 0.829 |
| *GDP* | -0.038 | 0.707 | 0.291*** | 0.000 | -0.180 | 0.157 | 0.010 | 0.795 |
| *UR* | -0.490 | 0.361 | 0.869 | 0.137 | 1.455*** | 0.002 | 2.061*** | 0.000 |
| *Cons* |  |  |  |  | 1.744** | 0.047 |  |  |
| *Rho* | -0.245 | 0.156 | -1.038*** | 0.000 |  |  | -0.886*** | 0.000 |
| *Lambda* |  |  |  |  |  |  |  |  |
| *LogL* | 135.212 |  | 188.360 |  |  |  | 135.855 |  |
| *R-squared* | 0.121 |  | 0.902 |  | 0.207 |  | 0.428 |  |
| *sigma^2* | 0.010*** | 0.000 | 0.001*** | 0.000 |  |  | 0.000*** | 0.000 |
| Change the Core Explanatory Variable | *D* | -1.239*** | 0.000 | -0.266** | 0.046 | -1.136*** | 0.000 | -0.143*** | 0.005 |
| *LR* | 0.009 | 0.568 | -0.004 | 0.555 | -0.100*** | 0.001 | -0.008** | 0.016 |
| *AR* | -0.014 | 0.220 | 0.001 | 0.785 | 0.039 | 0.114 | 0.010*** | 0.000 |
| *KR* | 0.001 | 0.167 | 0.000 | 0.465 | 0.001 | 0.420 | 0.000 | 0.725 |
| *PCR* | 0.064 | 0.390 | 0.035 | 0.226 | -0.120 | 0.225 | 0.067*** | 0.003 |
| *AI* | -0.107 | 0.106 | 0.054 | 0.313 | 0.085 | 0.141 | -0.132*** | 0.000 |
| *NI* | -0.011 | 0.160 | 0.003 | 0.575 | 0.003 | 0.844 | 0.008*** | 0.001 |
| *OPEN* | -0.062 | 0.402 | -0.240 | 0.186 | -0.617** | 0.035 | -0.046 | 0.660 |
| *GDP* | -0.093 | 0.293 | 0.296*** | 0.000 | 0.059 | 0.605 | -0.025 | 0.464 |
| *UR* | -0.631 | 0.172 | 1.073* | 0.064 | 0.483 | 0.205 | 1.779*** | 0.000 |
| Cons |  |  |  |  | 0.600 | 0.439 |  |  |
| *Rho* | -0.408** | 0.014 | -1.014*** | 0.000 |  |  | -1.028*** | 0.000 |
| *Lambda* |  |  |  |  |  |  |  |  |
| *LogL* | 156.479 |  | 190.388 |  |  |  | 138.376 |  |
| *R-squared* | 0.024 |  | 0.908 |  | 0.371 |  | 0.338 |  |
| *sigma^2* | 0.007*** | 0.000 | 0.001*** | 0.000 |  |  | 0.000*** | 0.000 |

Note: *** Significant at the 0.01 level, ** Significant at the 0.01 level, * Significant at the 0.01 level.

**Table A7.** Robustness test results of ecologicalization of the forestry industry structure.

| Variables | Change the Sample Size | | | | Change the Core Explanatory Variable | | | |
| --- | --- | --- | --- | --- | --- | --- | --- | --- |
| X | | W*X | | X | | W*X | |
| Results | *p* | Results | *p* | Results | *p* | Results | *p* |
| *D* | 0.005 | 0.957 | -0.901* | 0.063 | 0.013 | 0.880 | -0.444 | 0.270 |
| *LR* | 0.003 | 0.628 | 0.040 | 0.247 | 0.008 | 0.220 | 0.058 | 0.093 |
| *AR* | -0.001 | 0.889 | -0.054** | 0.037 | -0.005 | 0.277 | -0.054** | 0.034 |
| *KR* | 0.000 | 0.520 | 0.000 | 0.804 | 0.000 | 0.272 | -0.001 | 0.429 |
| *PCR* | 0.042 | 0.147 | 0.512*** | 0.001 | 0.045 | 0.122 | 0.378** | 0.014 |
| *AI* | -0.024 | 0.426 | -0.322** | 0.032 | 0.041 | 0.079 | -0.029 | 0.828 |
| *NI* | -0.012*** | 0.001 | 0.029 | 0.173 | -0.012*** | 0.001 | 0.012 | 0.555 |
| *OPEN* | 0.071* | 0.086 | 1.187*** | 0.000 | 0.074* | 0.058 | 1.156*** | 0.000 |
| *GDP* | 0.013 | 0.739 | 0.488** | 0.019 | -0.030 | 0.408 | 0.379* | 0.068 |
| *UR* | -0.218 | 0.390 | -7.091*** | 0.000 | 0.043 | 0.859 | -6.391*** | 0.000 |
| *Rho* | -0.286* | 0.067 |  |  | -0.253* | 0.082 |  |  |
| *LogL* | 580.521 |  |  |  | 620.718 |  |  |  |
| *R-squared* | 0.193 |  |  |  | 0.152 |  |  |  |
| *sigma^2* | 0.005*** | 0.000 |  |  | 0.006*** | 0.000 |  |  |

Note: *** Significant at the 0.01 level, ** Significant at the 0.01 level, * Significant at the 0.01 level.

**Table A8.** Robustness test results of ecologicalization of the forestry industry structure in four regions.

|  | Variables | Eastern | | Central | | Western | | Northeastern | |
| --- | --- | --- | --- | --- | --- | --- | --- | --- | --- |
| Results | *p* | Results | *p* | Results | *p* | Results | *p* |
| Change the Sample Size | *D* | 0.030 | 0.701 | 0.184 | 0.367 | -0.018 | 0.911 | 0.163 | 0.210 |
| *LR* | 0.009 | 0.417 | 0.010 | 0.467 | -0.027 | 0.101 | 0.009 | 0.578 |
| *AR* | -0.006 | 0.510 | -0.011 | 0.262 | 0.019 | 0.142 | -0.002 | 0.840 |
| *KR* | -0.001* | 0.097 | -0.001* | 0.052 | 0.001 | 0.115 | -0.001 | 0.116 |
| *PCR* | 0.138*** | 0.010 | -0.117* | 0.057 | 0.318*** | 0.000 | 0.007 | 0.936 |
| *AI* | 0.038 | 0.248 | -0.243** | 0.030 | -0.126*** | 0.000 | 0.009 | 0.859 |
| *NI* | -0.015*** | 0.006 | 0.003 | 0.761 | -0.006 | 0.403 | -0.028*** | 0.000 |
| *OPEN* | -0.079* | 0.092 | 0.086 | 0.825 | -0.548*** | 0.000 | -0.258 | 0.120 |
| *GDP* | -0.159** | 0.012 | 0.361*** | 0.005 | 0.313*** | 0.000 | -0.065 | 0.257 |
| *UR* | 1.139*** | 0.000 | -3.938*** | 0.001 | -0.302 | 0.159 | 1.009** | 0.019 |
| *Cons* | 1.093** | 0.039 |  |  | -1.206*** | 0.004 | 0.553 | 0.263 |
| *Rho* | -0.123 | 0.373 | -0.453** | 0.044 |  |  | 0.220* | 0.088 |
| *Lambda* |  |  |  |  |  |  |  |  |
| *LogL* | 176.100 |  | 128.378 |  |  |  | 67.964 |  |
| *R-squared* | 0.427 |  | 0.195 |  | 0.400 |  | 0.619 |  |
| *sigma^2* | 0.004*** | 0.000 | 0.003*** | 0.000 |  |  | 0.003*** | 0.000 |
| Change the Core Explanatory Variable | *D* | 0.006 | 0.953 | 0.231 | 0.415 | 0.388*** | 0.000 | 0.249* | 0.059 |
| *LR* | 0.009 | 0.415 | 0.010 | 0.479 | -0.032** | 0.037 | 0.010 | 0.542 |
| *AR* | -0.005 | 0.517 | -0.010 | 0.301 | 0.025** | 0.039 | -0.004 | 0.745 |
| *KR* | -0.001 | 0.107 | -0.001* | 0.055 | 0.001* | 0.056 | -0.001* | 0.071 |
| *PCR* | 0.137** | 0.012 | -0.114* | 0.064 | 0.361*** | 0.000 | -0.032 | 0.734 |
| *AI* | 0.039 | 0.241 | -0.237** | 0.039 | -0.127*** | 0.000 | -0.020 | 0.710 |
| *NI* | -0.015*** | 0.007 | 0.004 | 0.729 | -0.004 | 0.612 | -0.033*** | 0.000 |
| *OPEN* | -0.080* | 0.089 | 0.030 | 0.937 | -0.302** | 0.039 | -0.188 | 0.267 |
| *GDP* | -0.158** | 0.012 | 0.375*** | 0.003 | 0.229*** | 0.000 | -0.026 | 0.666 |
| *UR* | 1.144*** | 0.000 | -4.039*** | 0.001 | 0.045 | 0.812 | 1.027** | 0.014 |
| *Cons* | 1.087** | 0.040 |  |  | -0.801** | 0.040 | 0.516 | 0.287 |
| *Rho* | -0.129 | 0.348 | -0.449** | 0.047 |  |  | 0.179 | 0.181 |
| *Lambda* |  |  |  |  |  |  |  |  |
| *LogL* | 176.028 |  | 128.306 |  |  |  | 68.925 |  |
| *R-squared* | 0.425 |  | 0.120 |  | 0.465 |  | 0.647 |  |
| *sigma^2* | 0.004*** | 0.000 | 0.003*** | 0.000 |  |  | 0.003*** | 0.000 |

Note: *** Significant at the 0.01 level, ** Significant at the 0.01 level, * Significant at the 0.01 level.
